# Supplementary material for: Hydrogen bonding-tuned hydroxo-bridged tetra-copper Cu4(bipy)4-cluster supramolecular network to layered coordination polymer
Source: Royal Society of Chemistry journal article supplement (doi:10.1039/d0ce00985g), 2020-01-01
Supplement: d0ce00985g1.pdf [file d0ce00985g1.pdf]

## Supporting Information

### Hydrogen-bonding tuned hydroxo-bridged tetra-copper $\text{Cu}_4(\text{bipy})_4$ -cluster supramolecular network to layer coordination polymer

5

Jian Zhang<sup>a</sup>, Yang-Yang Chen<sup>a</sup>, Chun-Hong Tan<sup>a,\*</sup>, Xiao Ma<sup>b,\*</sup>, Xiao-Feng Wang<sup>a,c,\*</sup> and Guangchuan Ou<sup>d</sup>

<sup>a</sup> School of Chemistry and Chemical Engineering, University of South China, Hengyang 421001, P. R. China;

<sup>b</sup> Jiangsu Key Laboratory of Advanced Catalytic Materials and Technology, Advanced Catalysis and Green Manufacturing Collaborative Innovation Center, School of Petrochemical Engineering, Changzhou University, Changzhou 213164, P. R. China;

<sup>c</sup> Hunan Key Laboratory for the Design and Application of Actinide Complexes, University of South China, Hengyang 421001, P. R. China;

<sup>d</sup> Department of Biology and Chemistry, Hunan University of Science and Engineering, Yongzhou 425199, P. R. China.

### Table of Contents

#### 20 1. Materials and Instruments

##### 2. Tables

Table S1. Crystallographic data and structure refinement details for complexes **1-3**.

Table S2. Selected bond lengths (Å) and angles (deg) for complexes **1-3**.

##### 3. Figures

25 Figure S1. The PXRD curves of **1**.

Figure S2. The PXRD curves of **2**.

**Figure S3**. Curie–Weiss fit (red solid line) of the inverse magnetic susceptibility  $1/\chi_M$  for **1**

**Figure S3**. Curie–Weiss fit (red solid line) of the inverse magnetic susceptibility  $1/\chi_M$  for **1**

30

## Materials and Instruments

Three benzenedicarboxylic acids (Adamas-beta®) were purchased from Adamas Reagent Co. Ltd (Shanghai, China). Other chemicals were commercially available and used as received without further purification.

The C, H and N elemental analyses were carried out with a Vario EL elemental analyzer. The ATR-FTIR spectra of the powders without KBr were collected in the range of 500-4000 cm<sup>-1</sup> by a Thermo Nicolet 6700 spectrometer. Powder X-ray diffraction (PXRD) data were collected on a Rigaku D/max 2200 diffractometer with Cu-K $\alpha$  radiation ( $\lambda = 1.5418 \text{ \AA}$ ).

**Table S1.** Crystallographic data for complexes **1-3**.

| Compound               | 1                                                                              | 2                                                                              | 3                                                                              |
|------------------------|--------------------------------------------------------------------------------|--------------------------------------------------------------------------------|--------------------------------------------------------------------------------|
| Formula                | C <sub>56</sub> H <sub>60</sub> Cu <sub>4</sub> N <sub>8</sub> O <sub>20</sub> | C <sub>56</sub> H <sub>72</sub> Cu <sub>4</sub> N <sub>8</sub> O <sub>26</sub> | C <sub>28</sub> H <sub>42</sub> Cu <sub>2</sub> N <sub>4</sub> O <sub>16</sub> |
| Mr                     | 1419.28                                                                        | 1527.37                                                                        | 817.73                                                                         |
| Temp (K)               | 296                                                                            | 296                                                                            | 296                                                                            |
| Cryst system           | triclinic                                                                      | monoclinic                                                                     | monoclinic                                                                     |
| Space group            | $P\bar{1}$                                                                     | $P2_1/c$                                                                       | $P2_1/c$                                                                       |
| $a/\text{\AA}$         | 9.0471(7)                                                                      | 14.6945(17)                                                                    | 16.609(5)                                                                      |
| $b/\text{\AA}$         | 12.6873(9)                                                                     | 17.218(2)                                                                      | 16.984(5)                                                                      |
| $c/\text{\AA}$         | 13.3662(9)                                                                     | 25.968(3)                                                                      | 13.707(4)                                                                      |
| $\alpha/^\circ$        | 89.490(3)                                                                      | 90                                                                             | 90                                                                             |
| $\beta/^\circ$         | 73.453(3)                                                                      | 94.777(4)                                                                      | 110.014(5)                                                                     |
| $\gamma/^\circ$        | 75.303(3)                                                                      | 90                                                                             | 90                                                                             |
| $V/\text{\AA}^3$       | 1419.24(18)                                                                    | 6547.4(13)                                                                     | 3633.0(18)                                                                     |
| $Z$                    | 1                                                                              | 4                                                                              | 4                                                                              |
| $D_s/\text{g cm}^{-3}$ | 1.661                                                                          | 1.549                                                                          | 1.495                                                                          |
| $\mu/\text{mm}^{-1}$   | 1.565                                                                          | 1.369                                                                          | 1.245                                                                          |
| $F(000)$               | 728                                                                            | 3152                                                                           | 1696                                                                           |
| $R(\text{int})$        | 0.0298                                                                         | 0.0932                                                                         | 0.0394                                                                         |
| Total reflections      | 14891                                                                          | 179831                                                                         | 36818                                                                          |
| Unique reflections     | 6522                                                                           | 15129                                                                          | 8317                                                                           |
| $I > 2\sigma(I)$       | 4661                                                                           | 10407                                                                          | 7190                                                                           |
| $R_1$                  | 0.0321                                                                         | 0.0481                                                                         | 0.0753                                                                         |
| $wR_2$                 | 0.1016                                                                         | 0.1142                                                                         | 0.2668                                                                         |
| $S$                    | 1.004                                                                          | 1.042                                                                          | 1.156                                                                          |

**Table S2.** Selected bond distances (Å) and angles (°) for complexes **1-3**.

| <b>1</b>     |            | <b>2</b>   |            |           |            | <b>3</b> |          |
|--------------|------------|------------|------------|-----------|------------|----------|----------|
| Bond lengths |            |            |            |           |            |          |          |
| Cu1-O1       | 1.9436(17) | Cu1-O1     | 1.922(2)   | Cu2-O1W   | 2.246(2)   | Cu1-O5   | 1.950(3) |
| Cu1-O2       | 1.9277(17) | Cu1-O2     | 1.954(2)   | Cu3-O4    | 1.916(2)   | Cu1-O1   | 2.408(3) |
| Cu1-N3       | 1.977(2)   | Cu1-O3     | 2.312(2)   | Cu3-O3    | 1.9547(19) | Cu1-N2   | 2.005(4) |
| Cu1-N4       | 2.027(2)   | Cu1-N1     | 2.023(3)   | Cu3-O2    | 2.270(2)   | Cu1-N1   | 1.993(4) |
| Cu2-O2       | 1.9129(18) | Cu1-N2     | 1.990(3)   | Cu3-N8    | 2.020(3)   | Cu2-O4   | 1.943(3) |
| Cu2-O1       | 1.9586(17) | Cu2-O1     | 1.923(2)   | Cu4-O4    | 1.929(2)   | Cu2-O1   | 1.965(3) |
| Cu2-N1       | 1.993(2)   | Cu2-O2     | 1.959(2)   | Cu4-O3    | 1.980(2)   | Cu2-O5   | 2.392(3) |
| Cu2-N2       | 2.012(2)   | Cu2-N3     | 2.005(3)   | Cu4-N6    | 2.021(3)   | Cu2-N3   | 2.012(4) |
| Cu2-O1W      | 2.2437(19) | Cu2-N4     | 2.023(3)   | Cu4-O6    | 2.203(2)   | Cu2-N4   | 1.992(4) |
| <b>1</b>     |            | <b>2</b>   |            |           |            | <b>3</b> |          |
| Bond angles  |            |            |            |           |            |          |          |
| O2-Cu1-O1    | 82.26(7)   | O1-Cu1-O2  | 81.90(9)   | O5-Cu1-N1 | 174.76(14) |          |          |
| O2-Cu1-N3    | 95.87(9)   | O1-Cu1-N2  | 98.04(11)  | N1-Cu1-N2 | 81.22(16)  |          |          |
| O1-Cu1-N3    | 177.72(8)  | O2-Cu1-N2  | 177.25(10) | O5-Cu1-O1 | 81.24(11)  |          |          |
| O2-Cu1-N4    | 162.17(8)  | N2-Cu1-N1  | 80.77(11)  | N2-Cu1-O1 | 93.21(13)  |          |          |
| O1-Cu1-N4    | 100.53(8)  | N1-Cu1-O3  | 95.07(9)   | N1-Cu1-O1 | 94.64(13)  |          |          |
| N3-Cu1-N4    | 80.85(9)   | O1-Cu2-O2  | 81.76(9)   | O5-Cu1-N2 | 102.17(14) |          |          |
| O1-Cu1-O1    | 83.24(7)   | O1-Cu2-N3  | 170.52(10) | O1-Cu2-N4 | 175.27(14) |          |          |
| O2-Cu2-O1    | 82.25(7)   | O2-Cu2-N3  | 97.83(10)  | N4-Cu2-N3 | 80.92(16)  |          |          |
| O2-Cu2-N1    | 170.44(8)  | N3-Cu2-N4  | 80.46(11)  | O1-Cu2-O5 | 81.34(11)  |          |          |
| O1-Cu2-N1    | 97.62(8)   | O1-Cu2-O1W | 93.79(9)   | N4-Cu2-O5 | 100.09(13) |          |          |
| O2-Cu2-N2    | 95.37(8)   | O4-Cu3-O3  | 83.38(8)   | N3-Cu2-O5 | 96.50(12)  |          |          |
| O1-Cu2-N2    | 156.68(8)  | O4-Cu3-N7  | 97.05(10)  |           |            |          |          |
|              |            | N7-Cu3-N8  | 80.76(10)  |           |            |          |          |
|              |            | O3-Cu4-O6  | 98.36(8)   |           |            |          |          |
|              |            | N5-Cu4-O6  | 102.23(9)  |           |            |          |          |

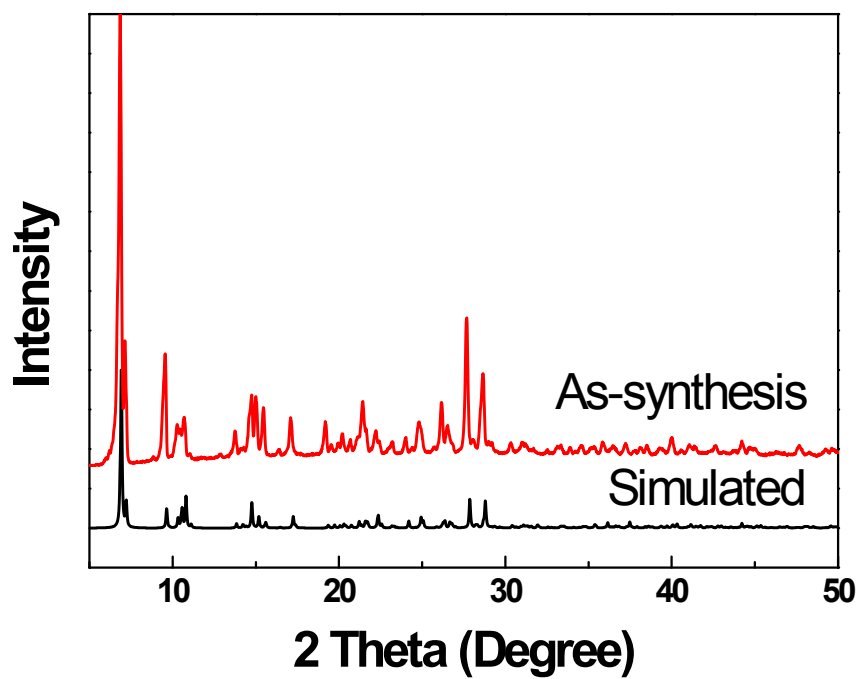

Figure S1. The PXRD curves of 1.

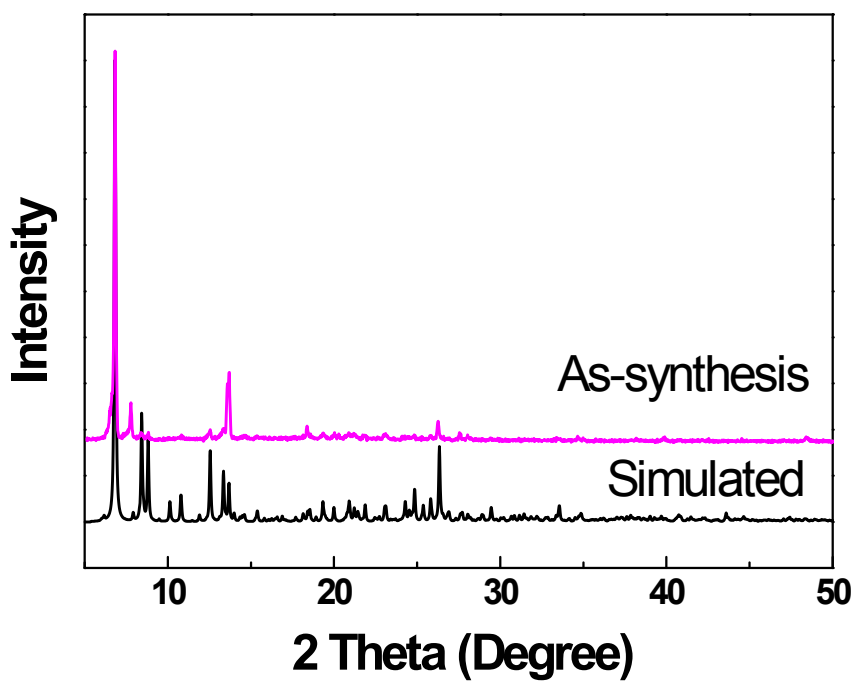

Figure S2. The PXRD curves of 2.

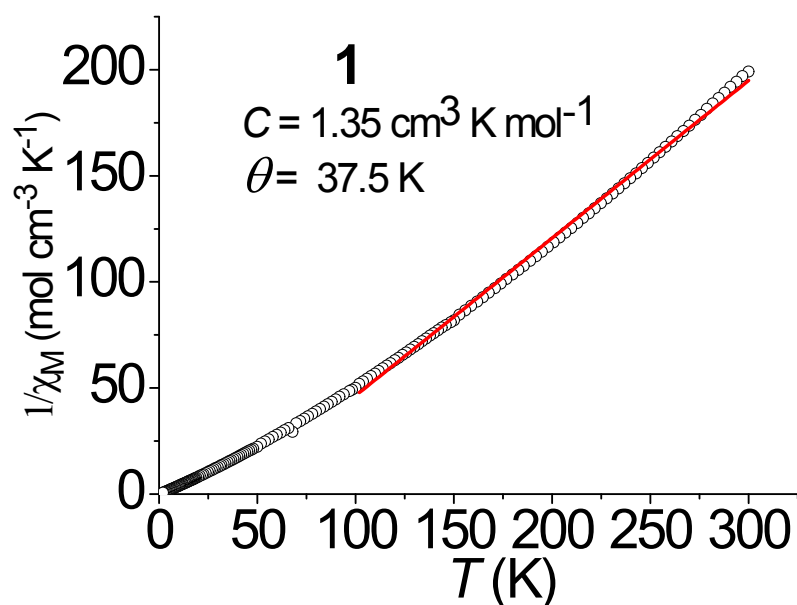

Figure S3. Curie-Weiss fit (red solid line) of the inverse magnetic susceptibility  $1/\chi_M$  for **1**

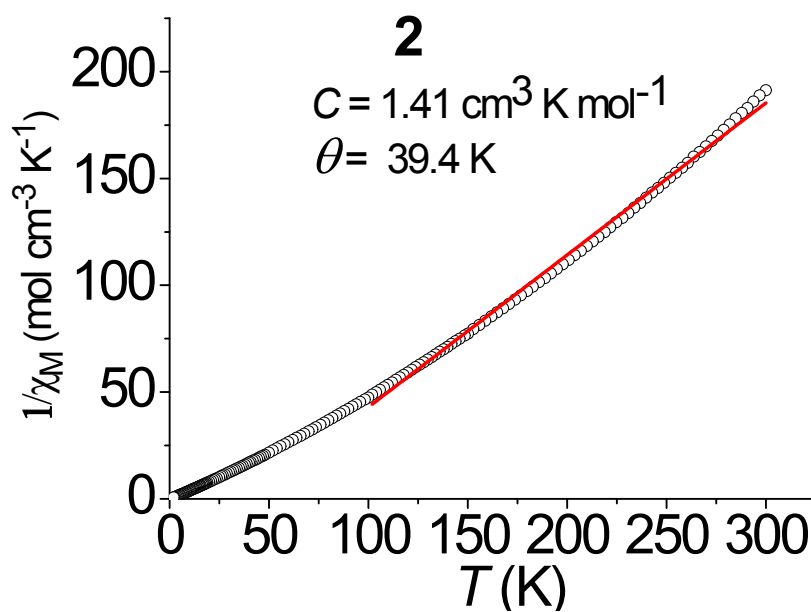

Figure S4. Curie-Weiss fit (red solid line) of the inverse magnetic susceptibility  $1/\chi_M$  for **2**
